# Supplementary material
Source: publisher figshare collection journal article supplement (https://sage.figshare.com/ndownloader/files/18125891)
Supplement: Supplementary file 1 [file 18125891]

## SUPPLEMENTARY MATERIAL

### e-Methods

#### *Supplementary neuroimaging methods*

A cerebral CT scan was required to rule out mainly the presence of intracranial hemorrhage. A second CT was performed 22 to 36 hours after starting the infusion of trial medication. Other scans (extra scans) were optional and were performed during admission within 7 days/discharge only in case of clinical deterioration; these scans were considered clinically relevant to the interpretation of the results as regard to the occurrence of symptomatic intracerebral hemorrhage (SICH). Neuroimaging data included current infarct, cerebral edema, and dense artery sign; these variables were part of the list of variables collected in the eCRF (electronic Case Report Form) that was built on the basis of the international registry on thrombolysis in stroke, SITS-ISTR (Safe Implementation of Treatments in Stroke – International Stroke Thrombolysis register). This because all patients treated with IV alteplase in the TESPI trial had to be also entered into the SITS-ISTR registry. In fact, all participating center of TESPI trial were also members of the SITS-ISTR registry. Therefore, “current infarction” was used for indicating the presence of early ischemic signs on the baseline CT scan suggestive of the presence of a current infarction and for indicating the presence of an actual infarction on follow-up scans both those performed at 22-36 h and extra scans. With regard to “cerebral oedema”, although all investigators tended to use the score for cerebral edema used for SITS-ISTR for the above mentioned reasons (COED 1: Focal brain swelling up to one third of the hemisphere; COED 2: Focal brain swelling greater than one third of the hemisphere; COED 3: Brain swelling with midline shift), no definition for cerebral edema was pre-specified in the study protocol. In the TESPI trial, it was just asked the expert neuroradiologists/radiologists/stroke neurologists of each stroke center to indicate if cerebral oedema was present, absent or uncertain. Similarly, we did not give a pre-specified definition for “dense artery sign” in the study protocol, therefore its identification was left to the expert neuroradiologists/radiologists/stroke neurologists of each participating stroke center. In any case, the term generally refers to the hyperattenuation of the middle cerebral artery, and not only (e.g. basilar artery), on non-enhanced CT scan.

Different intracerebral hemorrhage types were defined according to the ECASS study, as follows: hemorrhagic infarction type 1 (HI1), small petechiae along the margins of the infarct; HI2, confluent petechiae within the infarcted area without space-occupying effect; parenchymal hemorrhage type 1 (PH1), local, or intra-ischemic confluent hematoma in  $\leq 30\%$  of the infarcted area with at the most some slight space-occupying effect; PH2, local, or intra-ischemic confluent hematoma  $>30\%$  of the infarcted area with a substantial space-occupying effect. Remote hemorrhage indicated an hematoma of any size located remote from the index infarct.

Besides SICH per NINDS definition, pre-specified in the study protocol, SICH definitions according to ECASS II and SITS-MOST studies were also evaluated although they were not pre-specified in the study protocol. SICH according to the ECASS II study was defined as any hemorrhage plus a neurological deterioration of 4 points or more on the NIHSS from baseline, or from the lowest NIHSS value after baseline to 7 days or any hemorrhage leading to death. SICH according to SITS-MOST study was defined as local or remote parenchymal hemorrhage type 2 on the 22–36 h post-treatment imaging scan, combined with a neurological deterioration of 4 points or more on the NIHSS from baseline, or from the lowest NIHSS value between baseline and 24 h, or leading to death.

The definition of symptomatic cerebral edema was not pre-specified in the study protocol. It was intended post-hoc as brain edema detected at 22-36 h scans or extra scans as predominant cause of

clinical deterioration defined as an increase of 4 or more points of NIHSS at 24 h or 7 days from baseline or death.

### ***Supplementary statistical methods***

#### ***Handling of missing data***

Regarding missing data, as pre-specified in the study protocol, the last observation carried-forward method (LOCF), i.e. data from the last available visit or measurement replacing the missing data, and the worst score principle were applied as appropriate as sensitivity analyses. In particular, for NIHSS and NIHSS-related assessments, in case of missing values LOCF was adopted. In one case only the baseline NIHSS value was available and, therefore, it was carried forward to the next assessments (2h, 24h, and 7d).

With regard to mRS, Barthel Index (BI), and Glasgow Outcome Scale (GOS), these measures were collected only at 90 days and no previous assessments were foreseen in the study protocol, therefore, in case of missing data on 90-day outcome among patients known to be alive, the worst possible outcome score was assigned for each of these measures as follows: 5 for mRS; 0 for BI; 4 for GOS. In case of missing data, including those on survival, the worst possible outcome scores were assigned.

### **e-Results**

As to secondary endpoints, median NIHSS scores at 24 h and 7 days were lower in the alteplase group compared to control group with a borderline significant difference at 24 h and a statistically significant difference at 7 days (at 24 h, 5 [IQR 2-14] versus 9 [IQR 4-16],  $P=0.050$ ; at 7 days, (2.5 [IQR 0-10] vs 4 [IQR 1-12.5],  $P=0.042$ ) (Table e-2).

As regard the mean changes of NIHSS scores from baseline, patients treated with alteplase showed a statistically significant greater neurological improvement at both 24 h and 7 days compared with the control group (at 24 h: -3.6 [SD 5.6] vs -0.7 [SD 6.4],  $P=0.003$ ; at 7 days, (-6.0 [SD 6.6] vs -3.5 [SD 5.9],  $P=0.005$ ) (Table e-5). An improvement of  $\geq 4$  points at NIHSS or score 0-1 at 24 h and 7 days from baseline occurred in a significantly higher proportion of patients treated with alteplase compared with controls (43/86 [50.0%] vs 28/102 [27.5%],  $P=0.001$  and 57/85 [67.1%] vs 52/102 [51.5%],  $P=0.032$ , respectively) (Table e-5).

Exploratory analyses suggested that a better benefit/risk profile from alteplase compared with standard care was observed up to 88 years (90-day mRS 0-2: 32.9% vs 27.8%; 90-day mRS 0-1: 27.1% vs 21.5%; death: 14.5% vs 22.2%; SICH/NINDS: 6.9% vs 6.3%; SICH/ECASS: 4.2% vs 6.3%; SICH/SITS-MOST: 1.4% vs 1.3%; fatal ICH: 1.4 vs 1.3). However, it should be taken into account that the number of patients in the over-88 year age category is small and therefore this data should be interpreted with caution.

**Table e-1. Inclusion and exclusion criteria by treatment group**

|  | All   | Alteplase | Control |
|--|-------|-----------|---------|
|  | N=191 | N=88      | N=103   |

|                                                              |             |            |             |
|--------------------------------------------------------------|-------------|------------|-------------|
| Protocol violators (%)                                       | 23 (12.0)   | 6 (6.8)    | 17 (16.5)   |
| Number of patients with more than one protocol violation (%) | 1 (0.5)     | 0          | 1 (1.0)     |
| <i>Inclusion criteria</i>                                    |             |            |             |
| Age >80 years                                                | 191 (100.0) | 88 (100.0) | 103 (100.0) |
| Clinical diagnosis of ischemic stroke                        | 191 (100.0) | 88 (100.0) | 103 (100.0) |
| Onset of symptoms <3 hours                                   | 182 (95.3)  | 87 (98.8)  | 95 (92.2)   |
| Patient is willing to participate voluntarily                | 191 (100.0) | 88 (100.0) | 103 (100.0) |
| <i>Exclusion criteria</i>                                    |             |            |             |
| Symptoms of ischemic attack began more than 3 hours          | 9 (4.7)     | 1 (1.4)    | 8 (7.8)     |
| Severe stroke as assessed clinically (NIHSS >17)             | 7 (3.7)     | 2/88 (2.3) | 5/103 (4.9) |
| Patients with any history of prior stroke and diabetes       | 5 (2.6)     | 1/88 (1.1) | 4/103 (3.9) |
| Blood glucose <50 or >200 mg/dl                              | 1 (0.5)     | 0          | 1 (1.0)     |
| Known hemorrhagic diathesis                                  | 0           | 0          | 0           |
| Patients receiving oral anticoagulants                       | 1 (0.5)     | 0          | 1 (1.0)     |
| Patients receiving oral anticoagulants                       | 1 (0.5)     | 1 (1.1)    | 0           |
| Documented arterial aneurysm                                 | 1 (0.5)     | 1 (1.1)    | 0           |

NIHSS indicates National Institutes of health Stroke Scale; rt-PA, recombinant tissue-plasminogen activator.

**Table e-2. Demographics and baseline characteristics of patients (ITT population)**

|                                   | Alteplase    | Control      |
|-----------------------------------|--------------|--------------|
|                                   | N=88         | N=103        |
| <i>Demographics</i>               |              |              |
| Race (%)                          |              |              |
| - Caucasian                       | 85 (96.6)    | 100 (97.1)   |
| - Black                           | 0            | 0            |
| - Asiatic                         | 3 (3.4)      | 3 (2.9)      |
| - Other                           | 0            | 0            |
| Height (cm), mean (SD)            | 162.6 (13.6) | 161.6 (20.4) |
| <i>Risk factors</i>               |              |              |
| Number of risk factors (%)        |              |              |
| - 0                               | 4 (4.5)      | 9 (8.7)      |
| - 1                               | 31 (35.2)    | 24 (23.3)    |
| - 2                               | 27 (30.7)    | 33 (32.0)    |
| - 3                               | 15 (17.0)    | 27 (26.2)    |
| - 4                               | 8 (9.1)      | 7 (6.8)      |
| - 5                               | 3 (3.4)      | 3 (2.9)      |
| <i>Pre-stroke therapy</i>         |              |              |
| Antiplatelets at stroke onset (%) |              |              |
| - Dipyridamol                     | 2 (2.3)      | 3 (2.9)      |
| - Clopidogrel                     | 2 (2.3)      | 3 (2.9)      |
| - Other                           | 8 (9.1)      | 11 (10.7)    |
| Anticoagulants (IV) (%)           |              |              |
| - high dose (aPTT alterations)    | 0            | 0            |
| - low dose (no aPTT alterations)  | 0            | 2 (1.9)      |
| NIHSS, median (IQR)               | 12 (8-16)    | 11 (7-15)    |
| - <5 (%)                          | 2 (2.3)      | 6 (5.8)      |
| - 5-10 (%)                        | 35 (39.7)    | 37 (35.9)    |
| - >10 (%)                         | 51 (58.0)    | 60 (58.3)    |
| <i>Baseline Neuroimaging</i>      |              |              |
| Local hemorrhage, CT (%)          | 0            | 0            |
| Remote hemorrhage, CT (%)         | 0            | 0            |

|                                                 |               |                 |
|-------------------------------------------------|---------------|-----------------|
| PH2, CT Before (%)                              |               |                 |
| - no                                            | 87/88 (100.0) | 103/104 (100.0) |
| - yes                                           | 0             | 0               |
| - uncertain                                     | 0             | 0               |
| Cerebral edema, CT (%)                          |               |                 |
| - no                                            | 86/87 (98.9)  | 102/103 (99.0)  |
| - yes                                           | 0             | 0               |
| - uncertain                                     | 1/87 (1.1)    | 1/103 (1.0)     |
| Other Pathological Alterations (%)              |               |                 |
| - no                                            | 78/87 (89.7)  | 91/103 (88.3)   |
| - yes                                           | 9/87 (10.3)   | 12/103 (11.7)   |
| <i>Time intervals</i>                           |               |                 |
| Onset-to-Randomization time (min), median (IQR) | 152 (130-172) | 161 (135-178)   |
| - ≤60 (%)                                       | 0             | 0               |
| - ≤90 (%)                                       | 2 (2.3)       | 6 (5.8)         |
| - >90 (%)                                       | 86 (97.7)     | 97 (94.2)       |

a Variable with p value statistically significant.

aPTT indicates activated partial thromboplastin time; CT, computerized tomography; IQR, interquartile range; IV=intravenous; NIHSS, National Institutes of Health Stroke Scale; PH2, parenchymal hemorrhage 2; SD, standard deviation.

**Table e-3. Post-randomization data (ITT population)**

|                                                     | Alteplase             | Control              | P value                  |
|-----------------------------------------------------|-----------------------|----------------------|--------------------------|
|                                                     | N=88                  | N=103                |                          |
| <i>Clinical assessment</i>                          |                       |                      |                          |
| SBP, mean (SD), mmHg                                |                       |                      |                          |
| - 2h                                                | 148.7 (19.5)          | 148.9 (22.0)         | 0.948                    |
| - 24h                                               | 148.1 (21.6)          | 143.9 (23.3)         | 0.223                    |
| - 7d                                                | 138.5 (21.6)          | 142.0 (21.2)         | 0.348                    |
| DBP, mean (SD), mmHg                                |                       |                      |                          |
| - 2h                                                | 75.5 (13.3)           | 77.2 (12.9)          | 0.391                    |
| - 24h                                               | 75.2 (12.9)           | 74.3 (12.9)          | 0.646                    |
| - 7d                                                | 74.5 (13.1)           | 75.5 (9.8)           | 0.621                    |
| Total serum cholesterol levels at 24h, median (IQR) | 170.5 (150.50-187.25) | 176 (155-202)        | 0.315                    |
| Total serum cholesterol levels at 7d, median (IQR)  | 171 (152-195)         | 172.5 (157.25-195.5) | 0.974                    |
| NIHSS, median (IQR)                                 |                       |                      |                          |
| - After alteplase infusion                          |                       |                      |                          |
| - 2h                                                | 9 (5-15)              | 10 (6-15)            | 0.820 <sup>a</sup>       |
| - 24h                                               | 5 (2-14)              | 9 (4-16)             | <b>0.050<sup>a</sup></b> |
| - 7d                                                | 2.5 (0-10)            | 4 (1-12.5)           | <b>0.042<sup>a</sup></b> |
| <i>Treatment since admission<sup>c</sup></i>        |                       |                      |                          |
| Aspirin (%) <sup>b</sup>                            | 44/81 (54.3)          | 64/91 (70.3)         | <b>0.030</b>             |
| Dipyridamol (%)                                     | 2/81 (2.5)            | 2/91 (2.2)           | 1.000 <sup>b</sup>       |
| Clopidogrel (%)                                     | 20/81 (24.7)          | 20/91 (22.0)         | 0.674                    |
| Other antiplatelets (%)                             | 2/81 (2.5)            | 2/91 (2.2)           | 1.000 <sup>b</sup>       |
| Anticoagulants, high dose, (aPTT alterations) (%)   | 2/81 (2.5)            | 3/91 (3.3)           | 1.000 <sup>b</sup>       |
| Anticoagulants, low dose, (no aPTT alterations)(%)  | 47/81 (58.0)          | 59/91 (64.8)         | 0.359                    |
| Oral anticoagulants (%)                             | 13/81 (16.0)          | 14/91 (15.4)         | 0.905                    |
| Antihypertensive, IV(%)                             | 13/81 (16.0)          | 12/91 (13.2)         | 0.595                    |
| Antihypertensive, oral (%)                          | 61/81 (75.3)          | 67/91 (73.6)         | 0.801                    |
| <i>Neuroimaging assessment</i>                      |                       |                      |                          |
| Current infarct CT After (%)                        |                       |                      | 0.170 <sup>b</sup>       |
| - no                                                | 22/83 (26.5)          | 19/96 (19.8)         |                          |
| - yes                                               | 61/83 (73.5)          | 74/96 (77.1)         |                          |
| - uncertain                                         | 0                     | 3/96 (3.1)           |                          |

|                                           |              |              |                    |
|-------------------------------------------|--------------|--------------|--------------------|
| Current infarct CT Extra <sup>d</sup> (%) |              |              | 1.000 <sup>b</sup> |
| - no                                      | 2/22 (9.1)   | 2/23 (8.7)   |                    |
| - yes                                     | 20/22 (90.9) | 21/23 (91.3) |                    |
| - uncertain                               | 0            | 0            |                    |
| Dense artery sign CT After (%)            |              |              | 0.825 <sup>b</sup> |
| - no                                      | 68/83 (81.9) | 80/96 (83.3) |                    |
| - yes                                     | 12/83 (14.5) | 14/96 (14.6) |                    |
| - uncertain                               | 3/83 (3.6)   | 2/96 (2.1)   |                    |
| Dense artery sign CT Extra (%)            |              |              | 0.511 <sup>b</sup> |
| - no                                      | 15/22 (68.2) | 18/23 (78.3) |                    |
| - yes                                     | 6/22 (27.3)  | 5/23 (21.7)  |                    |
| - uncertain                               | 1/22 (4.5)   | 0            |                    |
| Local hemorrhage, CT (%)                  |              |              |                    |
| - After                                   | 7/83 (8.4)   | 11/96 (11.5) | 0.502              |
| - Extra                                   | 9/22 (40.9)  | 8/23 (34.8)  | 0.672              |
| Remote hemorrhage, CT (%)                 |              |              |                    |
| - After                                   | 1/83 (1.2)   | 1/96 (1.0)   | 1.000 <sup>b</sup> |
| - Extra                                   | 2/22 (9.1)   | 1/23 (4.3)   | 0.608 <sup>b</sup> |
| PH2, CT After (%)                         | 81/83 (97.6) | 92/96 (95.8) | 0.684 <sup>b</sup> |
| - no                                      | 1/83 (1.2)   | 3/96 (3.1)   |                    |
| - yes                                     | 1/83 (1.2)   | 1/96 (1.0)   |                    |
| - uncertain                               |              |              |                    |
| PH2, CT Extra (%)                         |              |              | 1.000 <sup>b</sup> |
| - no                                      | 20/22 (90.9) | 20/23 (87.0) |                    |
| - yes                                     | 2/22 (9.1)   | 3/23 (13.0)  |                    |
| - uncertain                               | 0            | 0            |                    |
| Cerebral edema, CT After (%)              |              |              | <b>0.004</b>       |
| - no                                      | 74/83 (89.2) | 69/96 (71.9) |                    |
| - yes                                     | 9/83 (10.8)  | 27/96 (28.1) |                    |
| - uncertain                               | 0            | 0            |                    |
| Cerebral edema, CT Extra (%)              |              |              | 0.140              |
| - no                                      | 17/22 (77.3) | 13/23 (56.5) |                    |
| - yes                                     | 5/22 (22.7)  | 10/23 (43.5) |                    |
| - uncertain                               | 0            | 0            |                    |

a Mann-Whitney U test.

b Fisher Exact

c "Treatment since admission" indicates both pre- and post-randomization treatments.

d Extra scans indicate other scans that were optional and were performed during admission within 7 days/discharge only in case of clinical deterioration.

CT indicates computerized tomography; DBP, diastolic blood pressure; IQR, interquartile range; NIHSS, National Institutes of Health Stroke Scale; PH2, parenchymal hemorrhage 2; SBP, systolic blood pressure; SD, standard deviation.

**Table e-4. Proportion of patients who completed the trial by treatment group in the ITT population**

|                                                                                                            | All        | Alteplase | Control   | P value |
|------------------------------------------------------------------------------------------------------------|------------|-----------|-----------|---------|
|                                                                                                            | N=191      | N=88      | N=103     |         |
| Patients completed the planned observation time until 90 days <sup>a</sup> (%)                             | 137 (71.7) | 68 (77.3) | 69 (67.0) | 0.117   |
| If not please specify why (%)                                                                              |            |           |           | 0.170   |
| - Death                                                                                                    | 41 (21.5)  | 15 (17.1) | 26 (25.2) | 0.911   |
| - Lost to follow-up <sup>a</sup>                                                                           | 2 (1.0)    | 1 (1.1)   | 1 (1.0)   | 0.862   |
| - Non compliant with protocol <sup>b</sup>                                                                 | 7 (3.7)    | 3 (3.4)   | 4 (3.9)   | ...     |
| - Other <sup>b</sup>                                                                                       | 1 (0.5)    | 1 (1.1)   | 0         |         |
| Patients completed the planned observation time until 90 days including patients who died <sup>b</sup> (%) | 178 (93.2) | 83 (94.3) | 95 (92.2) | 0.569   |

a Three more patients in the control group were considered lost to follow-up (it was impossible to contact them) because it was known that they were alive but data on mRS were missing; therefore they were not considered among the patients who had completed the planned observation time until 90 days.

b Patients that was declared by the investigators as not having completed the planned observation time until 90 days because non-compliant with protocol or for other reasons, were actually lost to follow-up because it was impossible to contact them otherwise these patients should have been considered at least “alive” by the investigators.

**Table e-5. Secondary efficacy endpoints and other safety endpoints by treatment group (mITT population for all secondary analyses concerning efficacy and safety outcome measures at 90 days, otherwise ITT population)**

|                                                                                         | Alteplase<br>N=88 | Control<br>N=103   | P value                  |
|-----------------------------------------------------------------------------------------|-------------------|--------------------|--------------------------|
| <i>Other Safety endpoints</i>                                                           |                   |                    |                          |
| - SICH (ECASS II) (%)                                                                   | 3/85 (3.5)        | 5/98 (5.1)         | 0.726 <sup>b</sup>       |
| Absolute difference (95% CI)                                                            | -1.6% (-6.2, 9.0) |                    |                          |
| Odds ratio (95% CI)                                                                     | 0.68 (0.16-2.94)  |                    |                          |
| Relative risk (95% CI) <sup>a</sup>                                                     | 0.69 (0.17-2.81)  |                    |                          |
| Relative difference                                                                     | -31%              |                    |                          |
| - SICH (SITS-MOST) (%)                                                                  | 1/85 (1.2)        | 1/98 (1.0)         | 1.0 <sup>b</sup>         |
| Absolute difference (95% CI)                                                            | 0.2% (-5.3, 6.3)  |                    |                          |
| Odds ratio (95% CI)                                                                     | 1.15 (0.07-18.75) |                    |                          |
| Relative risk (95% CI)                                                                  | 1.15 (0.07-18.15) |                    |                          |
| Relative difference                                                                     | 15%               |                    |                          |
| <i>Secondary efficacy endpoints</i>                                                     |                   |                    |                          |
| - NIHSS changes from baseline to 2 h                                                    |                   |                    | 0.224 <sup>c</sup>       |
| mean (SD)                                                                               | -2.0 (3.7)        | -1.2 (4.8)         |                          |
| median (IQR)                                                                            | -1.0 (-4, 0)      | 0 (-2, 0)          |                          |
| - NIHSS changes from baseline to 24h                                                    |                   |                    | <b>0.003<sup>c</sup></b> |
| mean (SD)                                                                               | -3.6 (5.6)        | -0.7 (6.4)         |                          |
| median (IQR)                                                                            | -3.5 (-7, 1)      | -1.0 (-3.25, 1.25) |                          |
| - NIHSS changes from baseline to 7d                                                     |                   |                    | <b>0.005<sup>c</sup></b> |
| mean (SD)                                                                               | -6.0 (6.6)        | -3.5 (5.9)         |                          |
| median (IQR)                                                                            | -6.0 (-10, -2.25) | -4.0 (-7.5, -0.5)  |                          |
| - NIHSS improvement (≥4 or score 0-1) at 7d (%)                                         | 57/85 (67.1)      | 52/102 (51.5)      | <b>0.032</b>             |
| - NIHSS <8 - mRS 0 response (%)                                                         | 5/83 (6.0)        | 10/94 (10.6)       | 0.271                    |
| - NIHSS 8-14 - mRS 0-2 response (%)                                                     | 11/83 (13.3)      | 8/94 (8.5)         | 0.309                    |
| - mRS at 90 days (0-1) (%)                                                              | 20/83 (24.1)      | 17/95 (17.9)       | 0.309                    |
| - Barthel Index ≥95 at 90 days (%)                                                      | 21/64 (32.8)      | 20/68 (29.4)       | 0.673                    |
| - Glasgow Outcome Scale 1-2 (good recovery/moderately disabled) at 90 days (%)          | 34/83 (41.0)      | 31/95 (32.6)       | 0.249                    |
| - Global Outcome (mRS 0-1; Barthel Index ≥95; Glasgow Outcome Scale 1-2) at 90 days (%) | 19/64 (29.7%)     | 17/68 (25.0)       | 0.546                    |
| <i>Other secondary efficacy outcomes (not pre-specified)</i>                            |                   |                    |                          |
| - NIHSS improvement (≥4 or score 0-1) at 24 h (%)                                       | 43/86 (50.0)      | 28/102 (27.5)      | <b>0.001</b>             |
| - Barthel Index ≥90 at 90 days (%)                                                      | 22/64 (34.4)      | 20/68 (29.4)       | 0.541                    |
| - Glasgow Outcome Scale 1 (good recovery) at 90 days (%)                                | 21/83 (25.3)      | 17/95 (17.9)       | 0.229                    |
| <i>Other safety endpoints</i>                                                           |                   |                    |                          |
| - ICH (%)                                                                               | 12/85 (14.1)      | 15/98 (15.3)       | 0.821                    |

|                                               |            |              |                    |
|-----------------------------------------------|------------|--------------|--------------------|
| - Asymptomatic ICH (%)                        | 7/85 (8.2) | 10/98 (10.2) | 0.647              |
| - Fatal SICH (%)                              | 1/85 (1.2) | 1/98 (1.0)   | 1.0 <sup>a</sup>   |
| - Symptomatic cerebral edema <sup>e</sup> (%) | 5/85 (5.9) | 9/97 (9.3)   | 0.478 <sup>b</sup> |

a RR is also presented for the main efficacy and safety outcome measures as it was pre-specified in the study protocol.

b Fisher's Exact Test

c Mann-Withney U test.

d Of note, the proportion of deaths in the control group (26.5%) is different from that reported in Figure 2 (27.4%) due to different denominators (95 in Figure 2), because there were 3 control patients alive but with a missing mRS.

e The denominator refers to the number of patients (182: 85 in the alteplase group and 97 in the control group) for whom data on the presence/absence of cerebral oedema on 22-36 h and extra scans (179: 83 in the alteplase group and 96 in the control group) or on extra scan alone (3: 2 in the alteplase group and 1 in the control group) were available.

CI indicates confidence intervals; ECASS, European Cooperative Acute Stroke Study; ICH, intracerebral haemorrhage; IQR, interquartile range; mRS, modified Rankin Scale; NIHSS, National Institutes of Health Stroke Scale; NINDS, National Institutes of Neurological Disorders and Stroke; SD, standard deviation; SICH, symptomatic intracerebral hemorrhage; SITS-MOST, Safe Implementation of Thrombolysis in Stroke - Monitoring Study.

**Table e-6. Analyses on primary efficacy endpoints, secondary efficacy endpoints, and safety endpoints by treatment group including missing values<sup>a</sup> (ITT population)**

|                                                                                                | Alteplase<br>N=88  | Control<br>N=103 | P value                  |
|------------------------------------------------------------------------------------------------|--------------------|------------------|--------------------------|
| <i>Primary efficacy endpoint</i>                                                               |                    |                  |                          |
| - mRS at 90 days (0-2) (%)                                                                     | 24/88 (27.3)       | 22/103 (21.4)    | 0.341                    |
| Absolute difference (95% CI)                                                                   | 5.9% (-6.9, 18.8)  |                  |                          |
| Odds ratio (95% CI)                                                                            | 1.38 (0.71-2.68)   |                  |                          |
| Relative risk (95% CI)                                                                         | 1.28 (0.77-2.11)   |                  |                          |
| Relative difference                                                                            | 28%                |                  |                          |
| <i>Safety endpoints</i>                                                                        |                    |                  |                          |
| - Death (with mRS 6 for missing values) (%)                                                    | 20/88 (22.7)       | 31/103 (30.1)    | 0.251                    |
| Absolute difference (95% CI)                                                                   | -7.4% (-6.0, 20.1) |                  |                          |
| Odds ratio (95% CI)                                                                            | 0.68 (0.36-1.31)   |                  |                          |
| Relative risk (95% CI)                                                                         | 0.76 (0.47-1.23)   |                  |                          |
| Relative difference                                                                            | 24%                |                  |                          |
| <i>Secondary efficacy endpoints</i>                                                            |                    |                  |                          |
| - NIHSS changes from 0-2 h                                                                     |                    |                  | 0.068 <sup>b</sup>       |
| mean (SD)                                                                                      | -2.0 (3.7)         | -1.2 (4.8)       |                          |
| median (IQR)                                                                                   | -1.0 (-4, 0)       | 0 (-2, 0)        |                          |
| - NIHSS changes from 0-24h                                                                     |                    |                  | <b>0.003<sup>b</sup></b> |
| mean (SD)                                                                                      | -3.6 (5.6)         | -0.6 (6.6)       |                          |
| median (IQR)                                                                                   | -3.0 (-7, 1)       | -1.0 (-3, 2)     |                          |
| - NIHSS changes from 0-7d                                                                      |                    |                  | <b>0.010<sup>b</sup></b> |
| mean (SD)                                                                                      | -5.7 (6.7)         | -3.4 (5.9)       |                          |
| median (IQR)                                                                                   | -6.0 (-10, -2.0)   | -4.0 (-7.25, -0) |                          |
| - NIHSS improvement ( $\geq 4$ or score 0-1) at 7d (%)                                         | 57/88 (64.8)       | 52/103 (50.5)    | <b>0.047</b>             |
| - NIHSS $< 8$ - mRS 0 response (%)                                                             | 5/88 (5.7)         | 10/103 (9.7)     | 0.302                    |
| - NIHSS 8-14 - mRS 0-2 response (%)                                                            | 11/88 (12.5)       | 8/103 (7.8)      | 0.276                    |
| - mRS at 90 days (0-1) (%)                                                                     | 20/88 (22.7)       | 17/103 (16.5)    | 0.278                    |
| - Barthel Index $\geq 95$ at 90 days (%)                                                       | 21/88 (23.9)       | 20/103 (19.4)    | 0.456                    |
| - Glasgow Outcome Scale 1-2 (good recovery/moderately disabled) (%)                            | 34/88 (38.6)       | 31/103 (30.1)    | 0.214                    |
| - Global Outcome (mRS 0-1; Barthel Index $\geq 95$ ; Glasgow Outcome Scale 1-2) at 90 days (%) | 19/88 (21.6%)      | 17/103 (16.5)    | 0.370                    |

*Other secondary efficacy outcomes(not pre-specified)*

|                                                          |              |               |              |
|----------------------------------------------------------|--------------|---------------|--------------|
| - NIHSS improvement ( $\geq 4$ or score 0-1) at 24 h (%) | 43/88 (48.9) | 28/103 (27.2) | <b>0.002</b> |
| - Barthel Index $\geq 90$ at 90 days (%)                 | 22/88 (25.0) | 20/103 (19.4) | 0.353        |
| - Glasgow Outcome Scale 1 (good recovery) at 90 days (%) | 21/88 (23.9) | 17/103 (16.5) | 0.204        |

a Regarding missing values, last observation carried-forward method, i.e. data from the last available visit or measurement replaced the missing data, and the worst score principle were applied as appropriate.

b Mann-Whitney U test.

CI indicates confidence intervals; ECASS indicates European Cooperative Acute Stroke Study; ICH, intracerebral haemorrhage; IQR, interquartile range; mRS, modified Rankin Scale; NIHSS, National Institutes of Health Stroke Scale; NINDS, National Institutes of Neurological Disorders and Stroke; SD, standard deviation; SICH, symptomatic intracerebral hemorrhage; SITS-MOST, Safe Implementation of Thrombolysis in Stroke - Monitoring Study.

**Table e-7. Causes of death by treatment group**

|                                                              | All          | Alteplase   | Control      | <i>P</i> value     |
|--------------------------------------------------------------|--------------|-------------|--------------|--------------------|
|                                                              | N=191        | N=88        | N=103        |                    |
| Primary cause of death (%)                                   |              |             |              | 0.790              |
| - Cerebral infarct                                           | 13/41 (31.7) | 3/15 (20.0) | 10/26 (38.5) | 0.227              |
| - Cerebral infarct and hemorrhage, without specification     | 4/41 (9.8)   | 2/15 (13.3) | 2/26 (7.7)   | 0.563              |
| - Pneumonia                                                  | 7/41 (17.1)  | 3/15 (20.0) | 4/26 (15.4)  | 0.709              |
| - Other vascular                                             | 3/41 (7.3)   | 1/15 (6.7)  | 2/26 (7.7)   | 0.905              |
| - Other                                                      | 14/41 (34.1) | 6/15 (40.0) | 8/26 (30.8)  | 0.553              |
| Cause of death reasonably related to alteplase treatment (%) | 1/41 (2.4)   | 1/15 (6.7)  | ...          | 0.366 <sup>a</sup> |

a Fisher's Exact Test.

**Table e-8. Adverse events<sup>a</sup> by treatment group in the ITT population**

|                                                           | All       | Alteplase | Control   | <i>P</i> value |
|-----------------------------------------------------------|-----------|-----------|-----------|----------------|
|                                                           | N=191     | N=88      | N=103     |                |
| All adverse events (%)                                    | 69 (36.1) | 34 (38.6) | 35 (34.0) | 0.506          |
| - Mild                                                    | 32 (16.8) | 18 (20.5) | 14 (13.6) | 0.207          |
| - Moderate                                                | 33 (17.3) | 14 (15.9) | 19 (18.4) | 0.645          |
| - Severe                                                  | 33 (17.3) | 18 (20.5) | 15 (14.6) | 0.284          |
| Serious adverse events (%)                                | 35 (18.3) | 19 (21.6) | 16 (15.5) | 0.282          |
| Patients with multiple serious adverse events (%)         | 9 (4.7)   | 5 (5.7)   | 4 (3.9)   | 0.560          |
| Serious adverse events possibly related to study drug (%) | 10 (5.2)  | 10 (11.4) | 0         | ...            |
| - SICH                                                    | 2 (1.0)   | 2 (2.3)   |           | ...            |
| - Allergic reaction                                       | 1 (0.5)   | 1 (1.1)   |           | ...            |
| - Macroscopic haematuria                                  | 1 (0.5)   | 1 (1.1)   |           | ...            |
| Serious adverse event for (%):                            |           |           |           |                |
| - Death                                                   | 11 (5.8)  | 4 (4.5)   | 7 (6.8)   | 0.507          |
| - Life-threatening                                        | 6 (3.1)   | 4 (4.5)   | 2 (1.9)   | 0.305          |
| - Disability                                              | 0         | 0         | 0         | ...            |
| - Hospitalization or prolonged hospitalization            | 17 (8.9)  | 10 (11.4) | 7 (6.8)   | 0.270          |
| - Relevant medical event                                  | 9 (4.7)   | 8 (9.1)   | 1 (1.0)   | <b>0.008</b>   |
| - Other                                                   | 0         | 0         | 0         | ...            |
| Serious adverse event outcome (%)                         |           |           |           |                |



|                                                              |           |           |           |              |
|--------------------------------------------------------------|-----------|-----------|-----------|--------------|
| - Recovered                                                  | 14 (7.3)  | 8 (9.1)   | 6 (5.8)   | 0.389        |
| - Recovering/Resolving                                       | 7 (3.7)   | 6 (6.8)   | 1 (1.0)   | <b>0.033</b> |
| - Not recovered                                              | 5 (2.6)   | 1 (1.1)   | 4 (3.9)   | 0.237        |
| - Recovered with sequelae                                    | 1 (0.5)   | 1 (1.1)   | 0         | ...          |
| - Fatal                                                      | 16 (8.4)  | 9 (10.2)  | 7 (6.8)   | 0.395        |
| - Unknown                                                    | 1 (0.5)   | 0         | 1 (1.0)   | ...          |
| Serious adverse event other than SICH and cerebral edema (%) | 42 (22.0) | 25 (28.4) | 17 (16.5) |              |
| - Pneumonia                                                  | 11 (5.8)  | 6 (6.8)   | 5 (4.8)   | 0.563        |
| - Pleuritis                                                  | 1 (0.5)   | 1 (1.1)   | 0         | ...          |
| - Cardiovascular                                             | 12 (6.3)  | 7 (7.9)   | 5 (4.8)   | 0.380        |
| - Pulmonary edema                                            | 2 (1.0)   | 1 (1.1)   | 1 (1.0)   | 0.911        |
| - Anemia                                                     | 3 (1.6)   | 2 (2.3)   | 1 (1.0)   | 0.472        |
| - Cerebrovascular ischemic event                             | 4 (2.1)   | 3 (3.4)   | 1 (1.0)   | 0.242        |
| - Dysphagia                                                  | 1 (0.5)   | 0         | 1 (1.0)   | ...          |
| - Agitation                                                  | 2 (1.0)   | 0         | 2 (1.9)   | ...          |
| - Acute cholecystitis                                        | 1 (0.5)   | 1 (1.1)   | 0         | ...          |
| - Urinary sepsis                                             | 1 (0.5)   | 0         | 1 (1.0)   | ...          |
| - Macroscopic hematuria                                      | 1 (0.5)   | 1 (1.1)   | 0         | ...          |
| - Laterocervical hematoma (after TEA)                        | 1 (0.5)   | 1 (1.1)   | 0         | ...          |
| - Femoral fracture after fall                                | 1 (0.5)   | 0         | 1 (1.0)   | ...          |
| - Vocal string paralysis                                     | 1 (0.5)   | 1 (1.1)   | 0         | ...          |
| - Allergic reaction                                          | 1 (0.5)   | 1 (1.1)   | 0         | ...          |
| - Fever                                                      | 1 (0.5)   | 1 (1.1)   | 0         | ...          |

a Analyses of adverse events were performed by comparing the proportion of patients with at least one event with patients randomized, all or by treatment group, as denominator.

SICH indicates symptomatic intracerebral hemorrhage; TEA, thromboendarterectomy.

**Table e-9. Primary efficacy endpoint, secondary efficacy endpoints, and safety endpoints by treatment group in the Per-Protocol population**

|                                  | Alteplase          | Control      | P value            |
|----------------------------------|--------------------|--------------|--------------------|
|                                  | N=82               | N=85         |                    |
| <i>Primary efficacy endpoint</i> |                    |              |                    |
| - mRS at 90 days (0-2) (%)       | 22/78 (28.2)       | 21/79 (26.6) | 0.820              |
| Absolute difference (95% CI)     | 1.6% (-13.0, 16.2) |              |                    |
| Odds ratio (95% CI)              | 1.09 (0.54-2.19)   |              |                    |
| Relative risk (95% CI)           | 1.06 (0.64-1.77)   |              |                    |
| Relative difference              | 6%                 |              |                    |
| <i>Safety endpoints</i>          |                    |              |                    |
| - Death (%)                      | 15/77 (19.5)       | 16/82 (19.5) | 0.996              |
| - SICH (NINDS) (%)               | 5/80 (6.3)         | 4/82 (4.9)   | 0.744 <sup>a</sup> |
| Absolute difference (95% CI)     | 1.4% (-7.4, 10.4)  |              |                    |
| Relative risk (95% CI)           | 1.28 (0.36-4.6)    |              |                    |
| Relative difference              | 28%                |              |                    |
| Odds ratio (95% CI)              | 1.3 (0.34-5.03)    |              |                    |
| - SICH (ECASS II) (%)            | 3/80 (3.8)         | 4/82 (4.9)   | 1.0 <sup>a</sup>   |
| Absolute difference (95% CI)     | -1.1% (-7.1, 9.4)  |              |                    |
| Relative risk (95% CI)           | 0.77 (0.18-3.33)   |              |                    |
| Relative difference              | -23%               |              |                    |
| Odds ratio (95% CI)              | 0.76 (0.16-3.51)   |              |                    |

|                                                                                                |                 |                |                          |
|------------------------------------------------------------------------------------------------|-----------------|----------------|--------------------------|
| - SICH (SITS-MOST) (%)                                                                         | 1/80 (1.3)      | 1/82 (1.2)     | 1.0 <sup>a</sup>         |
| <i>Secondary efficacy endpoints</i>                                                            |                 |                |                          |
| - NIHSS changes from 0-2 h                                                                     |                 |                | 0.037 <sup>b</sup>       |
| mean (SD)                                                                                      | -2.0 (3.6)      | -0.93 (4.1)    |                          |
| median (IQR)                                                                                   | -1.0 (-4.25, 0) | 0 (-1, 0)      |                          |
| - NIHSS changes from 0-24h                                                                     |                 |                | <b>0.005<sup>b</sup></b> |
| mean (SD)                                                                                      | -3.7 (5.6)      | -0.9 (6.8)     |                          |
| median (IQR)                                                                                   | -4.0 (-7, 1)    | -1.0 (-4, 0.5) |                          |
| - NIHSS changes from 0-7d                                                                      |                 |                | <b>0.013<sup>b</sup></b> |
| mean (SD)                                                                                      | -6.0 (6.6)      | -4.3 (5.9)     |                          |
| median (IQR)                                                                                   | -6.0 (-10, -3)  | -4.0 (-8, -1)  |                          |
| - NIHSS improvement ( $\geq 4$ or score 0-1) at 7 d (%)                                        | 54/80 (67.5)    | 45/83 (54.2)   | 0.083                    |
| - NIHSS <8 - mRS 0 response (%)                                                                | 5/78 (6.4)      | 9/78 (11.5)    | 0.262                    |
| - NIHSS 8-14 - mRS 0-2 response (%)                                                            | 10/78 (12.8)    | 8/78 (10.3)    | 0.616                    |
| - mRS at 90 days (0-1) (%)                                                                     | 18/78 (23.1)    | 16/79 (20.3)   | 0.668                    |
| - Barthel Index $\geq 95$ at 90 days (%)                                                       | 19/59 (32.2)    | 19/62 (30.6)   | 0.854                    |
| - Glasgow Outcome Scale 1-2 at 90 days (%)                                                     | 32/78 (41.0)    | 30/79 (38.0)   | 0.696                    |
| - Global Outcome (mRS 0-1; Barthel Index $\geq 95$ ; Glasgow Outcome Scale 1-2) at 90 days (%) | 17/59 (28.8%)   | 16/62 (25.8)   | 0.710                    |
| <i>Other secondary efficacy outcomes (not pre-specified)</i>                                   |                 |                |                          |
| - NIHSS improvement ( $\geq 4$ or score 0-1) at 24 h (%)                                       | 42/81 (51.9)    | 24/84 (28.6)   | <b>0.002</b>             |
| - Barthel Index $\geq 90$ at 90 days (%)                                                       | 20/59 (33.9)    | 19/62 (30.6)   | 0.702                    |
| - Glasgow Outcome Scale =1 (good recovery) at 90 days (%)                                      | 19/78 (24.4)    | 16/79 (20.3)   | 0.537                    |
| <i>Other safety endpoints</i>                                                                  |                 |                |                          |
| - ICH (%)                                                                                      | 11/80 (13.8)    | 11/82 (13.4)   | 0.950                    |
| - Asymptomatic ICH (%)                                                                         | 6/80 (7.5)      | 7/82 (8.5)     | 0.808                    |
| - Fatal SICH (%)                                                                               | 1/80 (1.3)      | 1/82 (1.2)     | 1.0 <sup>a</sup>         |
| - Symptomatic cerebral edema <sup>c</sup> (%)                                                  | 5/80 (6.3)      | 7/81 (8.6)     | 0.565 <sup>a</sup>       |

a Fisher's Exact Test.

b Mann-Whitney U test.

c The denominator refers to the number of patients (161: 80 in the alteplase group and 81 in the control group) for whom data on the presence/absence of cerebral edema on 22-36 h and extra scans (158: 78 in the alteplase group and 80 in the control group) or on extra scan alone (3: 2 in the alteplase group and 1 in the control group) were available.

ECASS indicates European Cooperative Acute Stroke Study; IQR, interquartile range; mRS, modified Rankin Scale; NIHSS, National Institutes of Health Stroke Scale; NINDS, National Institutes of Neurological Disorders and Stroke; SD, standard deviation; SICH, symptomatic intracerebral hemorrhage; SITS-MOST, Safe Implementation of Thrombolysis in Stroke - Monitoring Study.

**Figure e-1.**

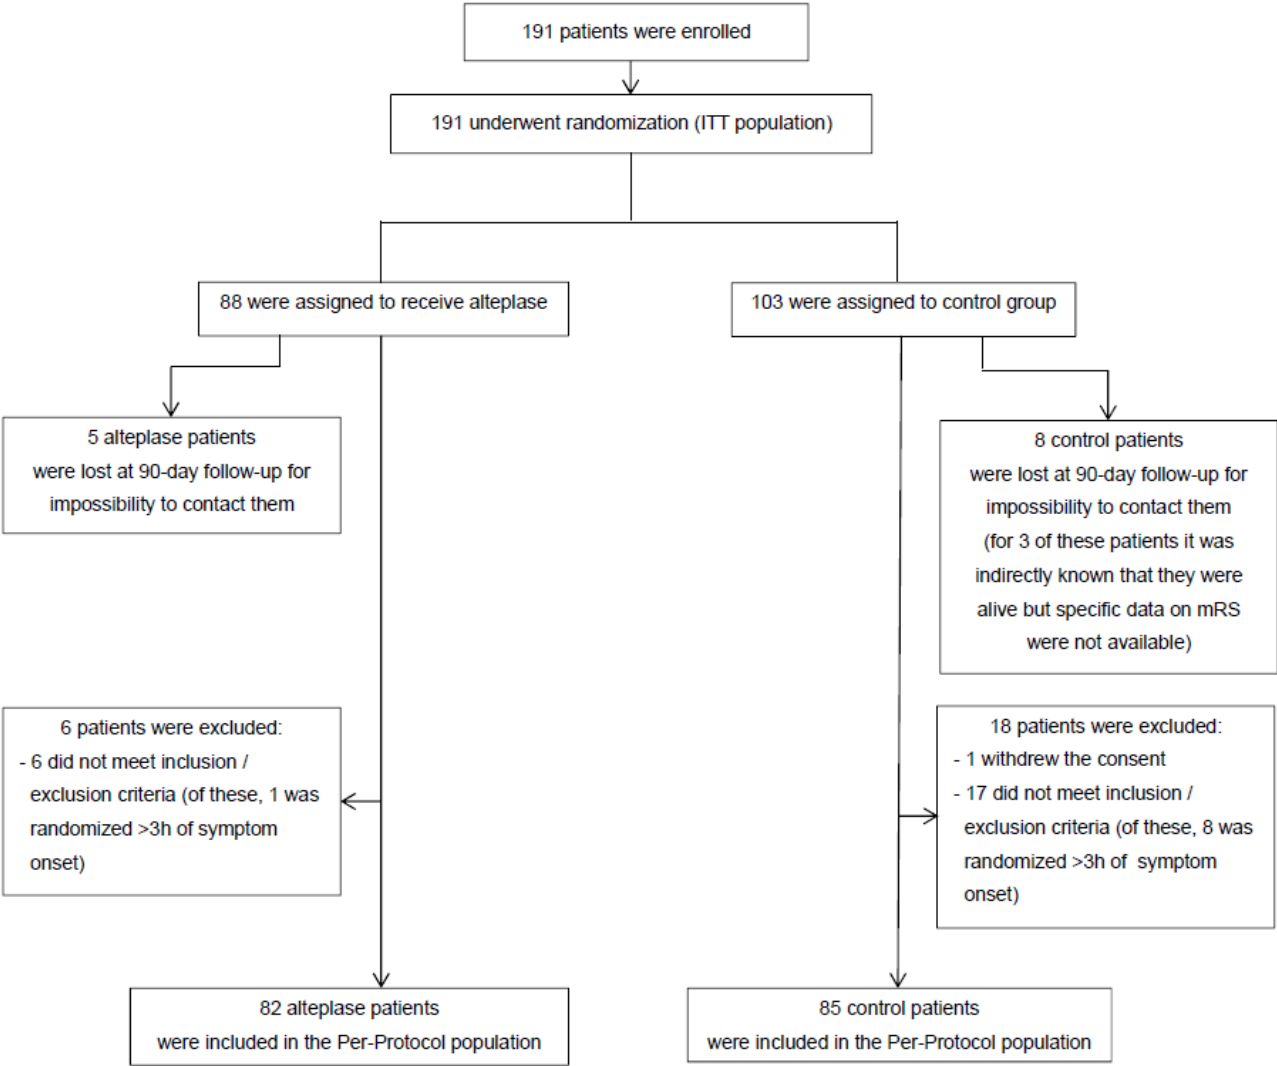

Figure e-2.

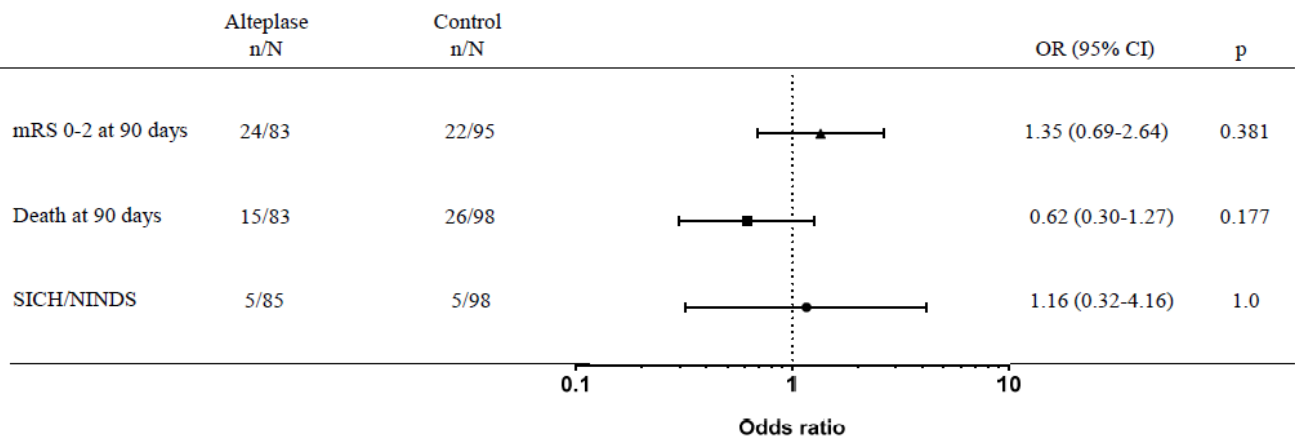

Figure e-3.

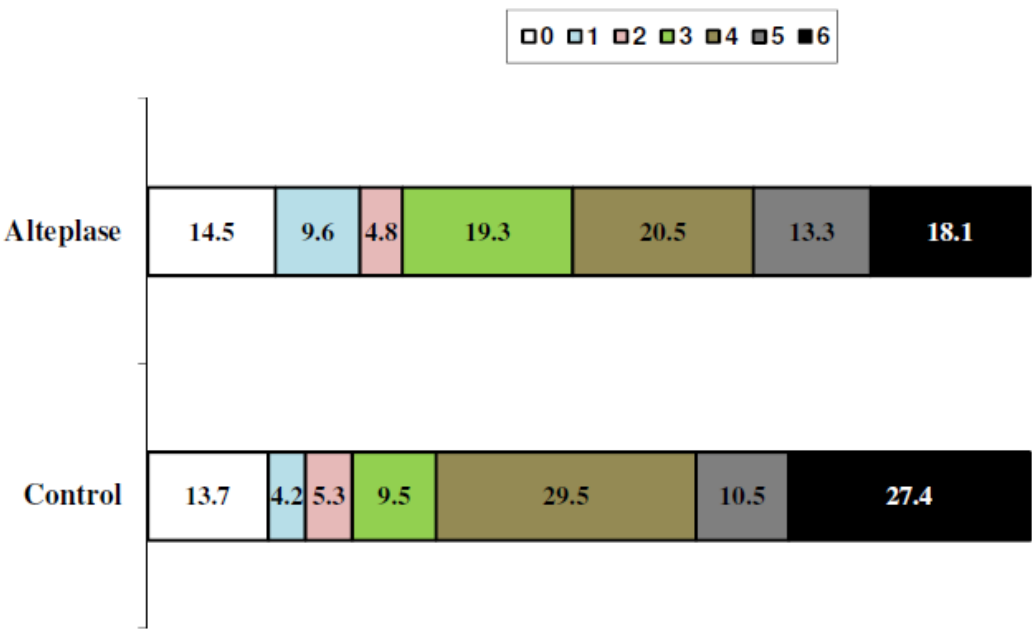

Figure e-4.

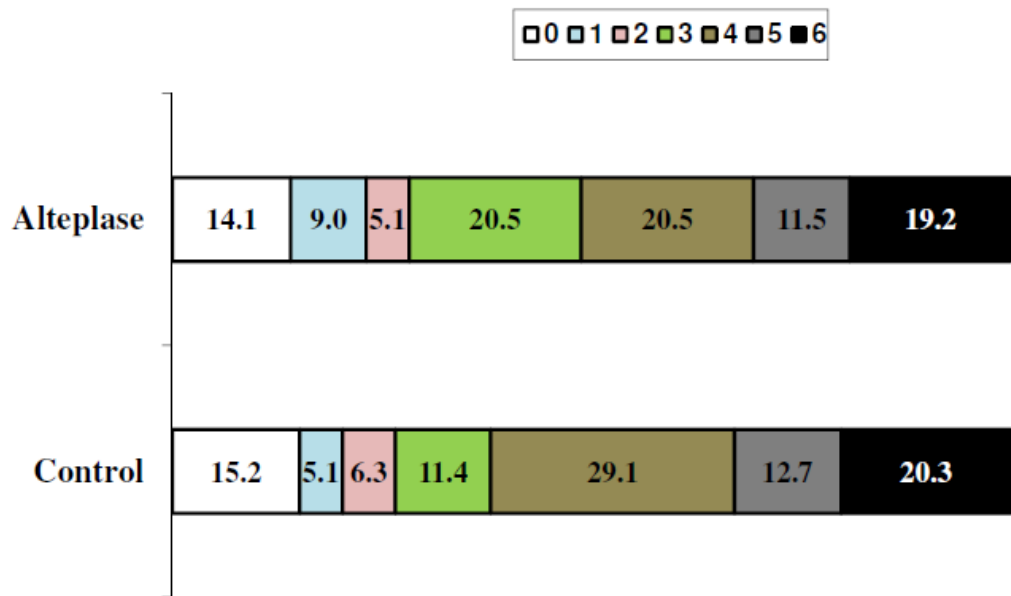

Figure e-5.

A.

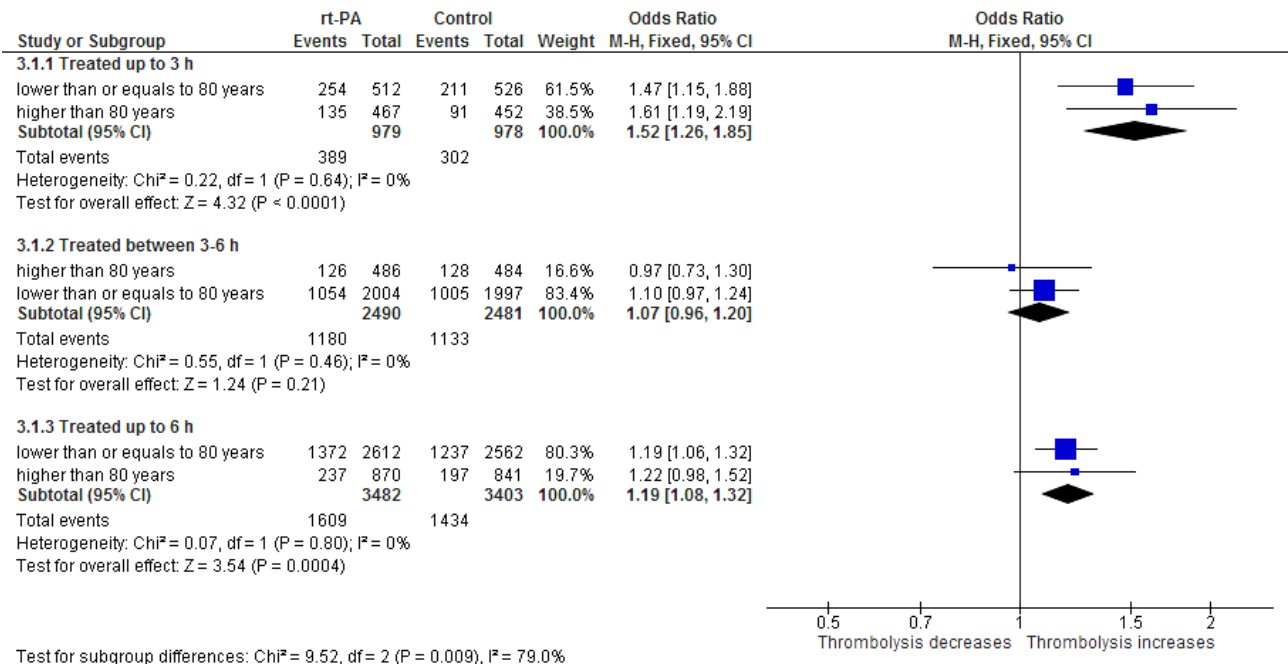

B.

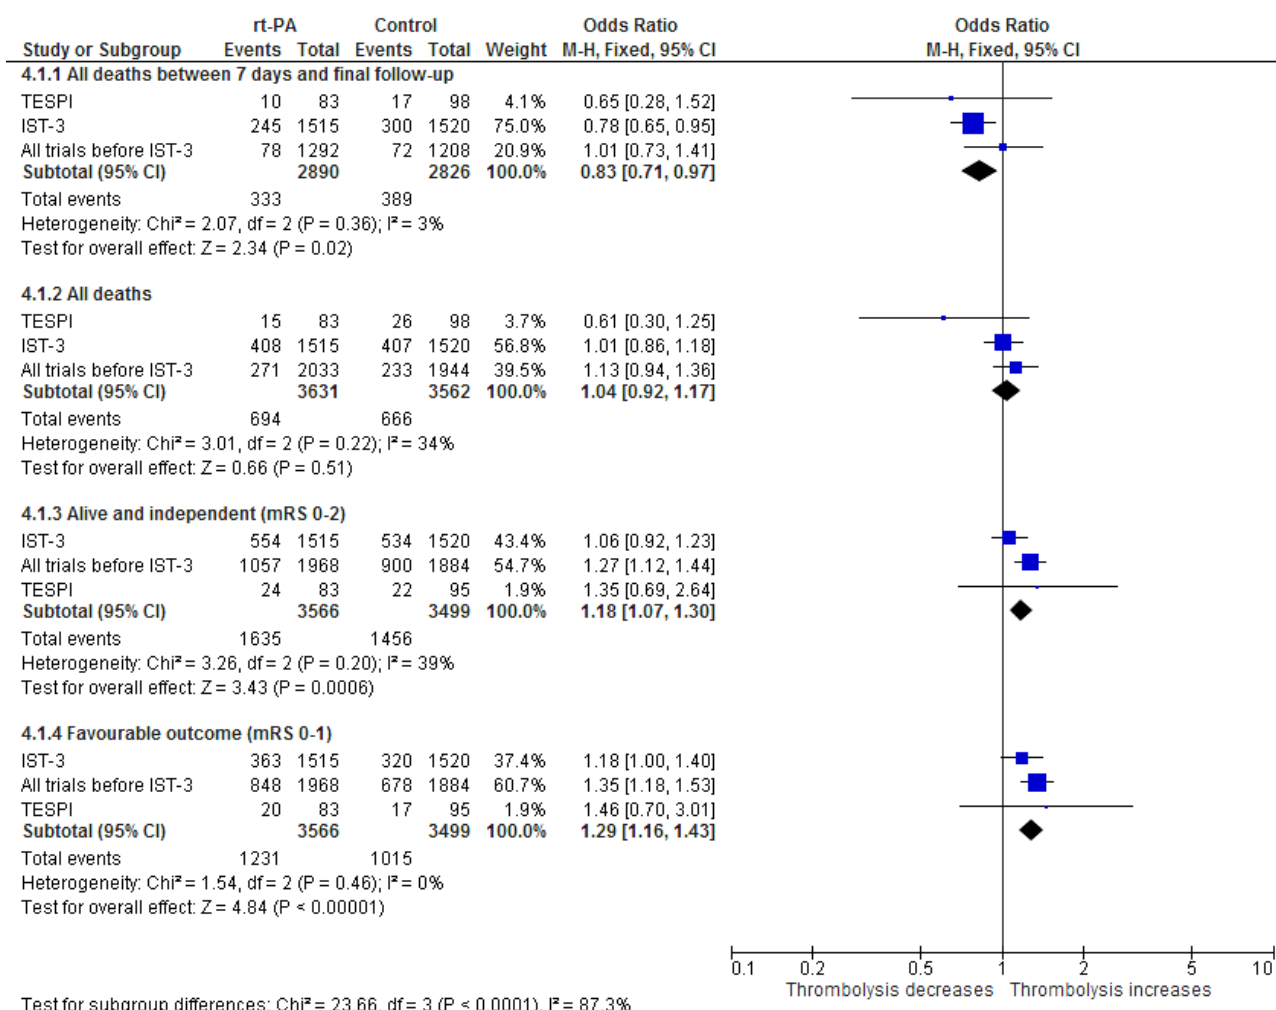

### Figure e-1 legend

Patients enrolled and included in the Intention-to-Treat (ITT) and Per-Protocol (PP) population.

### Figure e-2 legend

Effect of alteplase on favorable outcome and mortality at 90 days and on symptomatic intracerebral hemorrhage (SICH) (ITT population)

### Figure e-3 legend

Distribution of modified Rankin Scale scores at 90 days in the mITT population. Ordinal logistic regression analysis showed non-statistically significant results (OR 1.49 95% CI 0.89-2.5; P=0.126).

### Figure e-4 legend

Distribution of modified Rankin Scale scores at 90 days in the Per-Protocol population

### Figure e-5 legend

Forest plots of the meta-analysis of previous randomized controlled trials on alteplase updated with TESPI data; IST-3 had the vast majority of the older 80 year olds in the totality of data (data are numbers, unless otherwise indicated; rt-PA indicates recombinant tissue plasminogen activator; IST-3, Third International Stroke Trial; mRS, modified Rankin Scale)

*Panel A legend.* Effects of alteplase (rt-PA) on alive and independent (mRS 0-2) at the end of follow-up, subgrouped by age and time to treatment (TESPI data are included in the subgroup of patients treated up to 3 h).

*Panel B legend.* Effects of alteplase on outcomes at final follow-up (treatment was administered up to 6 h after the stroke).

## **Appendix e-1. List of TESPI trial Investigators**

Principal Investigator and National Coordinator: Danilo Toni

Steering Committee: Cesare Fieschi (Chairman); Danilo Toni, Domenico Inzitari, Roberto Sterzi, Antonio Carolei (Members)

Data Monitoring Safety Board (DSMB): Gianluigi Lenzi (Chairman); Marco Fiorelli, Annarita Vestri (Members)

CRO: Roberto Verna, Moira Cordisco, Ugo Lancia (CRISC - Centro di Ricerca per la Sperimentazione Clinica (Centre for Clinical Research), Sapienza University, Rome, Italy); CRO Scientific Board and Technical Coordinator: Paolo Primiero; Administrative and monitoring Practices: Antonella Noy di Lannoy

Statistical analyses: Svetlana Lorenzano; Annarita Vestri (statistician)

Investigators: *Roma, Policlinico Umberto I* - Danilo Toni (PI), Svetlana Lorenzano, Agata Correnti; *Verona, University Hospital* - Paolo Bovi, Manuel Cappellari; *Roma, Policlinico Tor Vergata Hospital* - Paolo Stanzone, Domenico Samà; *Firenze, Santa Maria Annunziata* - Maddalena Bruscoli, Germana Ruggiano; *Modena, Ospedale Civile S. Agostino-Estense* - Milena Cavazzuti, Andrea Zini; *Roma, S. Andrea Hospital* - Maurizia Rasura, Mario Beccia; *Milano, Scientific Institute S. Raffaele* - Giancarlo Comi, Maria Sessa; *Genova, University Hospital* - Carlo Gandolfo, Maurizio Balestrino; *Perugia, S. Maria della Misericordia Hospital* - Giancarlo Agnelli, Valeria Caso, Monica Acciaresi, Maurizio Paciaroni; *Cuneo, Santa Croce e Carle Hospital* - Piercarlo Gerbino Promis; *Roma, San Camillo Hospital* - Claudio Pozzessere, Sabrina Anticoli; *Vicenza, Bortolo Hospital* - Francesco Perini, Michela Marcon; *Prato, Prato Hospital* - Annalisa Vinattieri, Alba Caruso; *Brescia, Spedali Civili di Brescia* - Mauro Magoni; *Imperia, Ospedale Civile di Imperia* - Mauro Furlan; *Bari, Azienda Ospedaliera Ospedale Policlinico Consorziale* - Francesco Federico, Domenico Mezzapesa; *Pisa Azienda Ospedaliera Universitaria Policlinico S. Chiara* - Giovanni Orlandi; *Roma, Policlinico "A. Gemelli"* - Vincenzo Di Lazzaro; *Cremona, Azienda Istituti Ospedalieri di Cremona* - Luigi Bettoni, Gianstefano Baietti; *Udine, University Hospital* - Maria Rosaria Valente; *Firenze, Azienda Ospedaliera Universitaria Careggi* - Patrizia Nencini.

## **Appendix e-2. Author contribution**

Svetlana Lorenzano: study concept/design, study supervision, data acquisition, statistical analysis/interpretation of data, drafting/revising the manuscript for intellectual content

Annarita Vestri: study design, statistical analysis/interpretation of data, revising the manuscript for intellectual content  
Paolo Bovi, Manuel Cappellari, Paolo Stanzione, Domenico Samà, Maddalena Bruscoli, Milena Cavazzuti, Andrea Zini, Maurizia Rasura, Mario Beccia, Giancarlo Comi, Maria Sessa, Carlo Gandolfo, Maurizio Balestrino, Giancarlo Agnelli, Valeria Caso, Piercarlo Gerbino Promis, Claudio Pozzessere, Sabrina Anticoli, Francesco Perini, Michela Marcon, Annalisa Vinattieri, Alba Caruso, Mauro Magoni, Mauro Furlan, Giovanni Orlandi, Vincenzo Di Lazzaro, Mariarosaria Valente, Patrizia Nencini: data acquisition, revising the manuscript for intellectual content  
Danilo Toni: study concept/design, study supervision, data acquisition, interpretation of data, drafting/revising the manuscript for intellectual content.



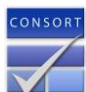

# CONSORT 2010 checklist of information to include when reporting a randomised trial\*

| Section/Topic                    | Item No | Checklist item                                                                                                                                                                              | Reported on page No                |
|----------------------------------|---------|---------------------------------------------------------------------------------------------------------------------------------------------------------------------------------------------|------------------------------------|
| <b>Title and abstract</b>        |         |                                                                                                                                                                                             |                                    |
|                                  | 1a      | Identification as a randomised trial in the title                                                                                                                                           | 1                                  |
|                                  | 1b      | Structured summary of trial design, methods, results, and conclusions (for specific guidance see CONSORT for abstracts)                                                                     | 3                                  |
| <b>Introduction</b>              |         |                                                                                                                                                                                             |                                    |
| Background and objectives        | 2a      | Scientific background and explanation of rationale                                                                                                                                          | 4,5                                |
|                                  | 2b      | Specific objectives or hypotheses                                                                                                                                                           | 4,5                                |
| <b>Methods</b>                   |         |                                                                                                                                                                                             |                                    |
| Trial design                     | 3a      | Description of trial design (such as parallel, factorial) including allocation ratio                                                                                                        | 5                                  |
|                                  | 3b      | Important changes to methods after trial commencement (such as eligibility criteria), with reasons                                                                                          | 5-9<br>Supplementary material: 1,2 |
| Participants                     | 4a      | Eligibility criteria for participants                                                                                                                                                       | 5                                  |
|                                  | 4b      | Settings and locations where the data were collected                                                                                                                                        | 5                                  |
| Interventions                    | 5       | The interventions for each group with sufficient details to allow replication, including how and when they were actually administered                                                       | 5                                  |
| Outcomes                         | 6a      | Completely defined pre-specified primary and secondary outcome measures, including how and when they were assessed                                                                          | 5,6                                |
|                                  | 6b      | Any changes to trial outcomes after the trial commenced, with reasons                                                                                                                       | 5,6                                |
| Sample size                      | 7a      | How sample size was determined                                                                                                                                                              | 7                                  |
|                                  | 7b      | When applicable, explanation of any interim analyses and stopping guidelines                                                                                                                | NA                                 |
| <b>Randomisation:</b>            |         |                                                                                                                                                                                             |                                    |
| Sequence generation              | 8a      | Method used to generate the random allocation sequence                                                                                                                                      | 5                                  |
|                                  | 8b      | Type of randomisation; details of any restriction (such as blocking and block size)                                                                                                         | 5                                  |
| Allocation concealment mechanism | 9       | Mechanism used to implement the random allocation sequence (such as sequentially numbered containers), describing any steps taken to conceal the sequence until interventions were assigned | NA                                 |
| Implementation                   | 10      | Who generated the random allocation sequence, who enrolled participants, and who assigned participants to interventions                                                                     | 5                                  |
| Blinding                         | 11a     | If done, who was blinded after assignment to interventions (for example, participants, care providers, those assessing outcomes) and how                                                    | 5,6                                |

|                                                      |     |                                                                                                                                                   |                                                                            |
|------------------------------------------------------|-----|---------------------------------------------------------------------------------------------------------------------------------------------------|----------------------------------------------------------------------------|
| Statistical methods                                  | 11b | If relevant, description of the similarity of interventions                                                                                       | NA                                                                         |
|                                                      | 12a | Statistical methods used to compare groups for primary and secondary outcomes                                                                     | 7-9                                                                        |
|                                                      | 12b | Methods for additional analyses, such as subgroup analyses and adjusted analyses                                                                  | 7-9;<br>Supplementar<br>y material: 1,2                                    |
| <b>Results</b>                                       |     |                                                                                                                                                   |                                                                            |
| Participant flow (a diagram is strongly recommended) | 13a | For each group, the numbers of participants who were randomly assigned, received intended treatment, and were analysed for the primary outcome    | 10;<br>Supplementar<br>y material:<br>2,3,11,14                            |
|                                                      | 13b | For each group, losses and exclusions after randomisation, together with reasons                                                                  | 10;<br>Supplementar<br>y material:<br>11,14                                |
| Recruitment                                          | 14a | Dates defining the periods of recruitment and follow-up                                                                                           | 10                                                                         |
|                                                      | 14b | Why the trial ended or was stopped                                                                                                                | 4,5                                                                        |
| Baseline data                                        | 15  | A table showing baseline demographic and clinical characteristics for each group                                                                  | 23,24;<br>Supplementar<br>y material: 3,4                                  |
| Numbers analysed                                     | 16  | For each group, number of participants (denominator) included in each analysis and whether the analysis was by original assigned groups           | 10                                                                         |
| Outcomes and estimation                              | 17a | For each primary and secondary outcome, results for each group, and the estimated effect size and its precision (such as 95% confidence interval) | 10-13,25;<br>Supplementar<br>y material:<br>2,4-6,12,14                    |
|                                                      | 17b | For binary outcomes, presentation of both absolute and relative effect sizes is recommended                                                       | 10-13,25;<br>Supplementar<br>y material:<br>2,4-6,12                       |
| Ancillary analyses                                   | 18  | Results of any other analyses performed, including subgroup analyses and adjusted analyses, distinguishing pre-specified from exploratory         | 11-<br>13,22,26,27;<br>Supplementar<br>y material:<br>2,4-6,8-<br>10,13,14 |
| Harms                                                | 19  | All important harms or unintended effects in each group (for specific guidance see CONSORT for harms)                                             | 11,12;<br>Supplementar<br>y material: 8,9                                  |

**Discussion**

|                  |    |                                                                                                                  |              |
|------------------|----|------------------------------------------------------------------------------------------------------------------|--------------|
| Limitations      | 20 | Trial limitations, addressing sources of potential bias, imprecision, and, if relevant, multiplicity of analyses | <u>16</u>    |
| Generalisability | 21 | Generalisability (external validity, applicability) of the trial findings                                        | <u>16</u>    |
| Interpretation   | 22 | Interpretation consistent with results, balancing benefits and harms, and considering other relevant evidence    | <u>13-17</u> |

**Other information**

|              |    |                                                                                 |          |
|--------------|----|---------------------------------------------------------------------------------|----------|
| Registration | 23 | Registration number and name of trial registry                                  | <u>6</u> |
| Protocol     | 24 | Where the full trial protocol can be accessed, if available                     | <u>7</u> |
| Funding      | 25 | Sources of funding and other support (such as supply of drugs), role of funders | <u>9</u> |

---
